# Supplementary material for: QTL mapping of the production of wine aroma compounds by yeast
Source: PubMed Central journal article supplement (PMC3575298; doi:10.1186/1471-2164-13-573), 2012-10-30

Figure S1: Distribution of the different phenotypes for the population of segregants and parental strains

April 30, 2012

- parent S288C: black circle
- parent 59A: white circle

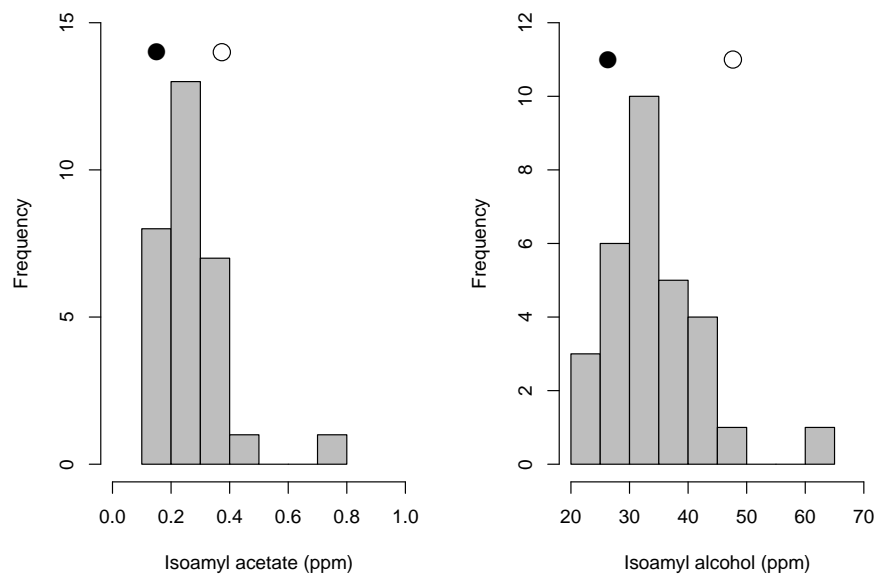

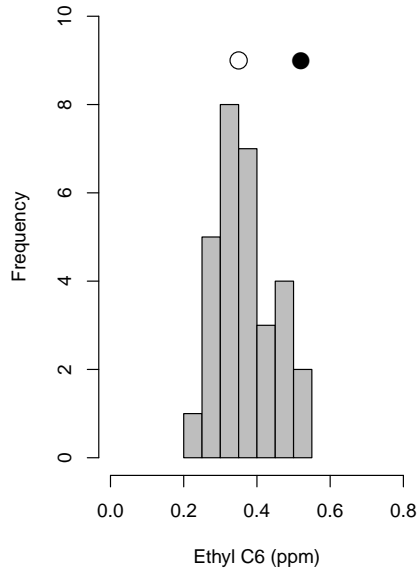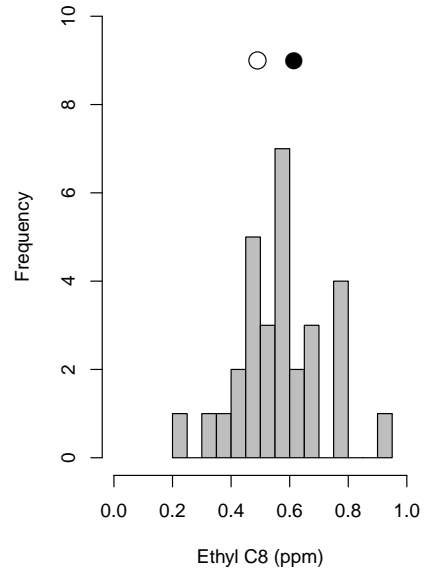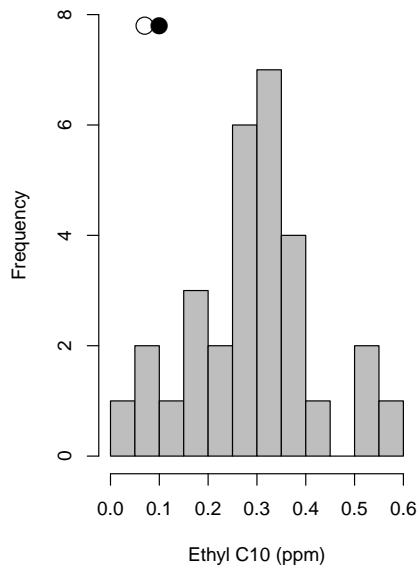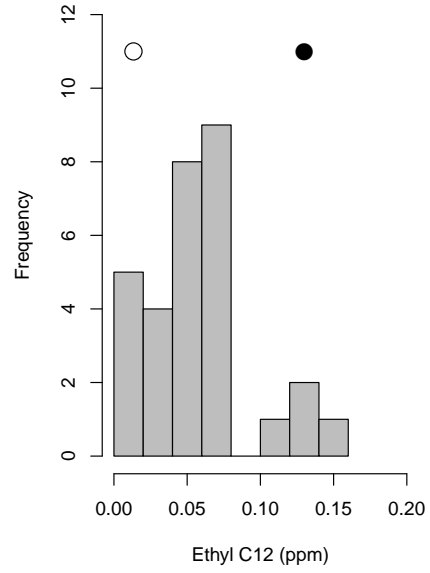

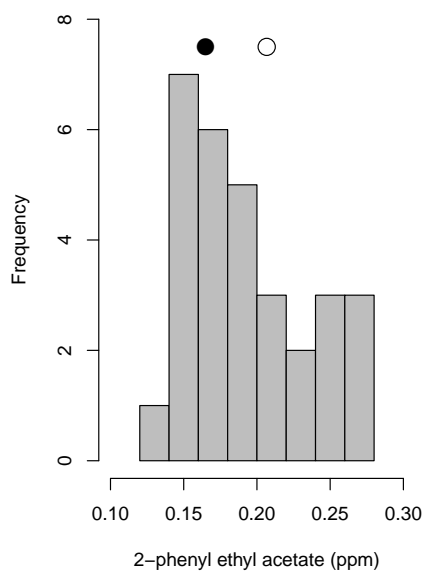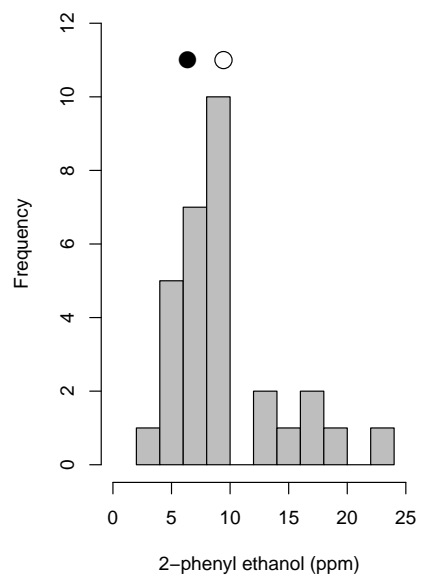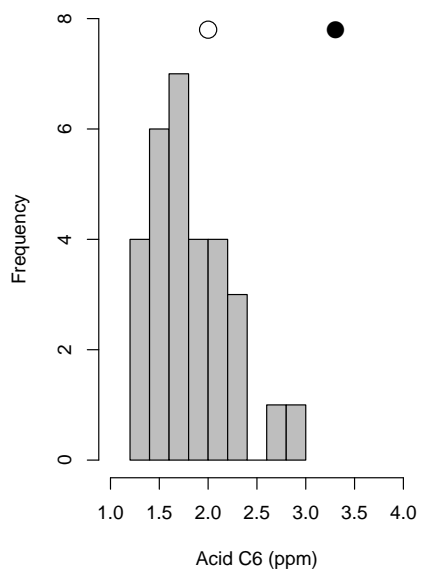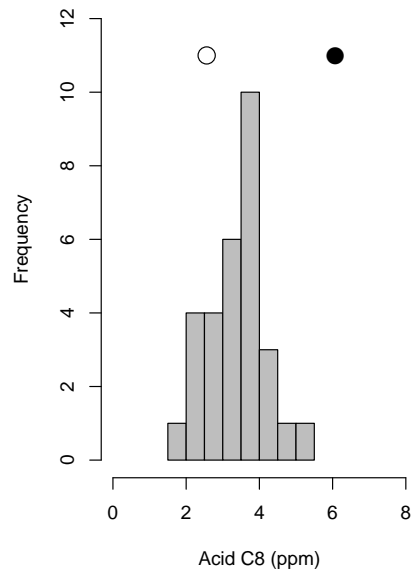

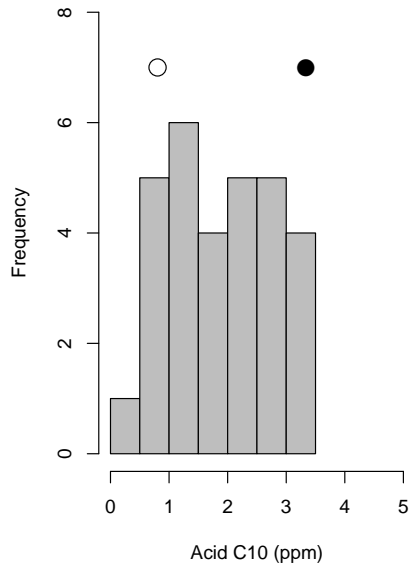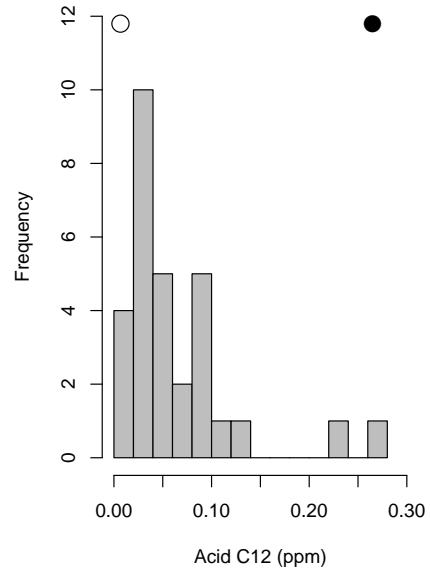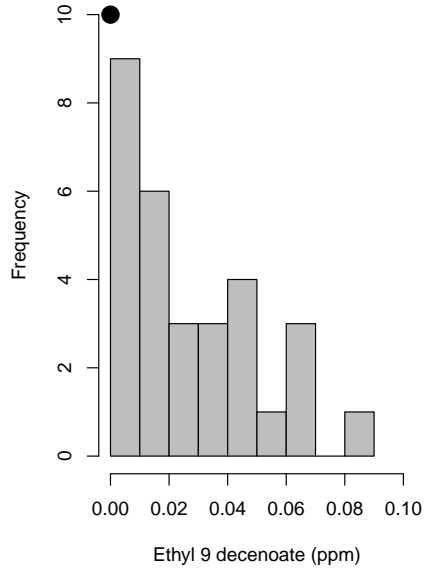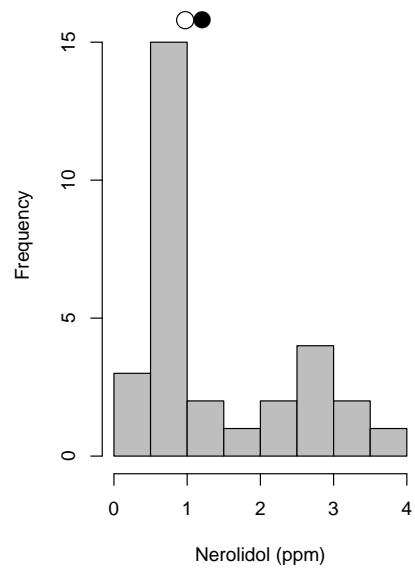

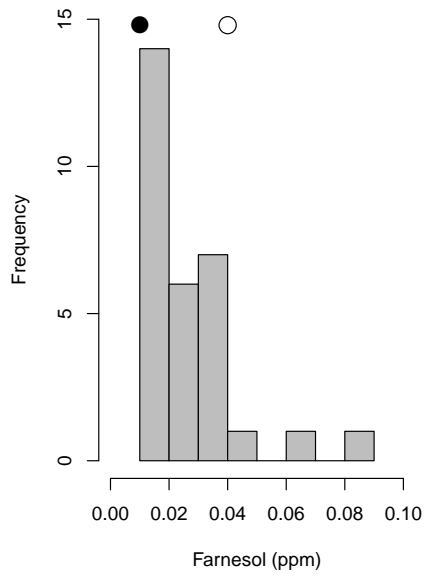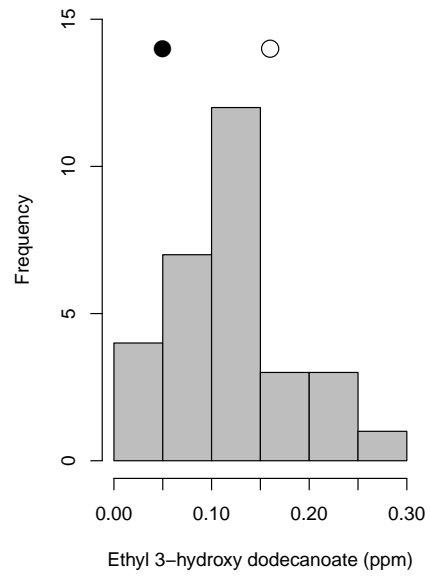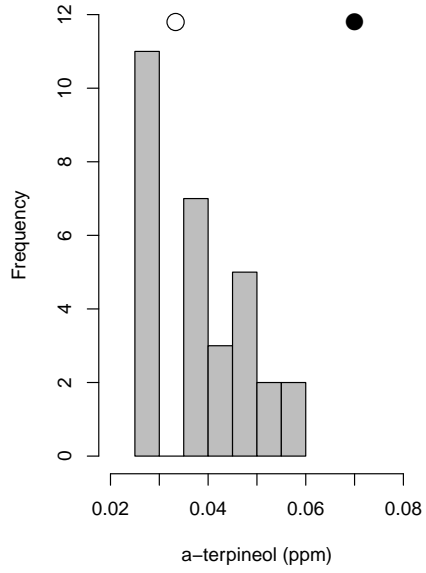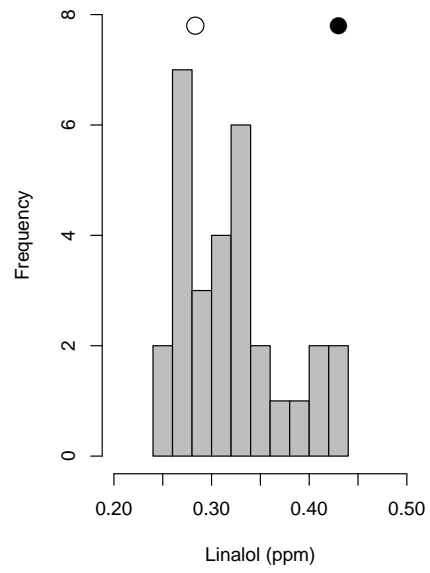

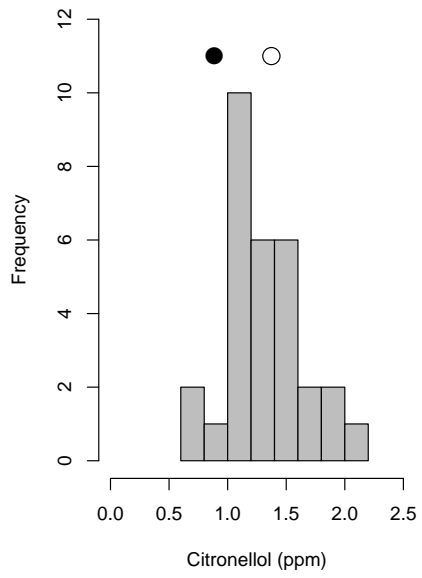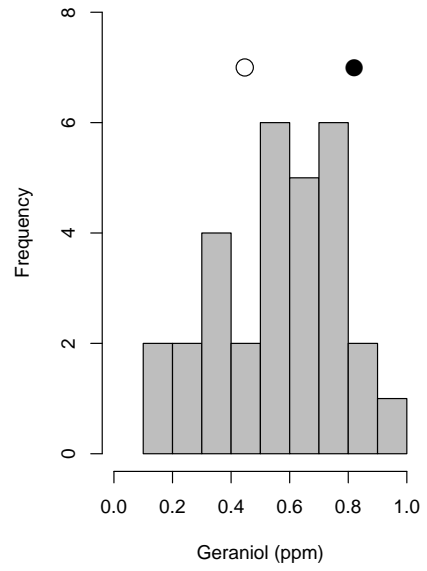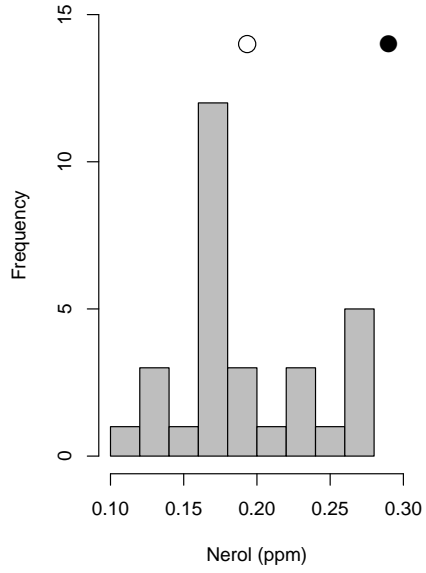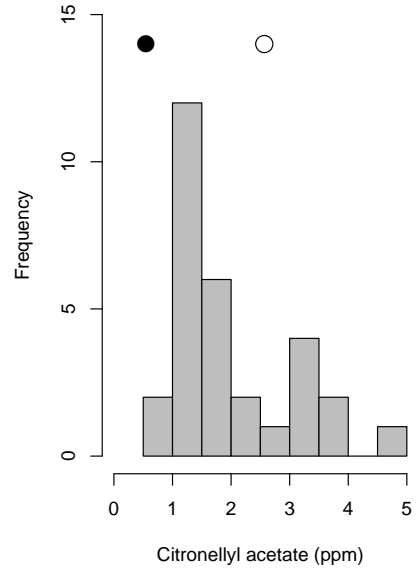

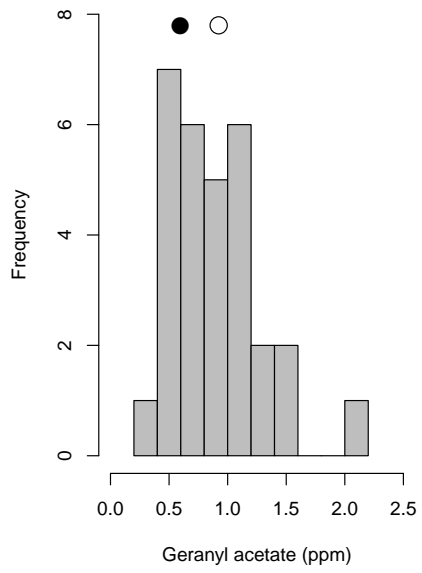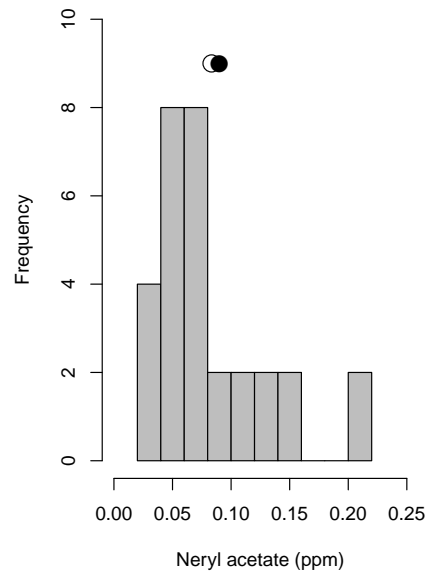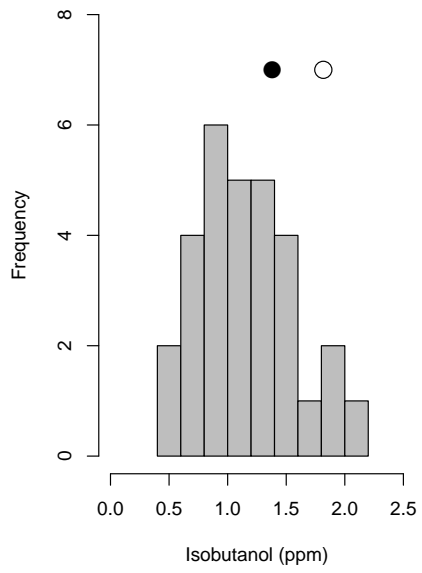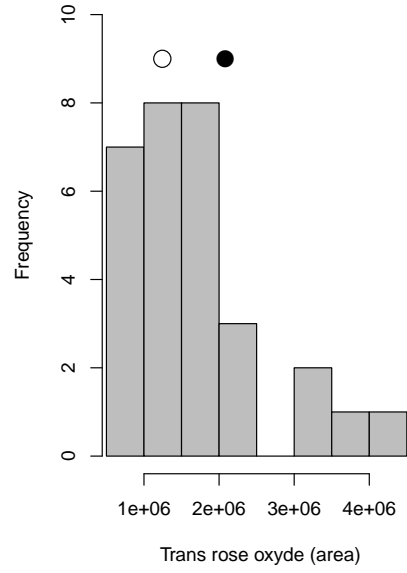

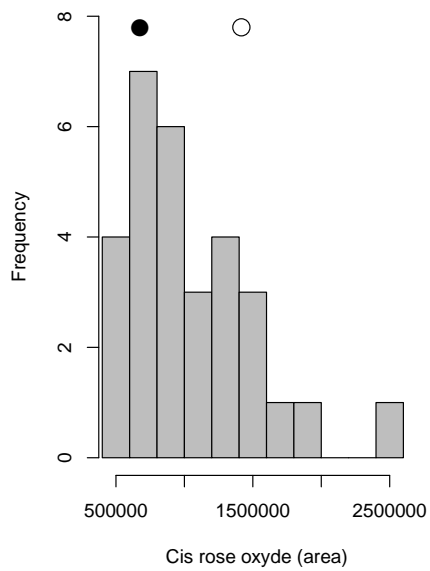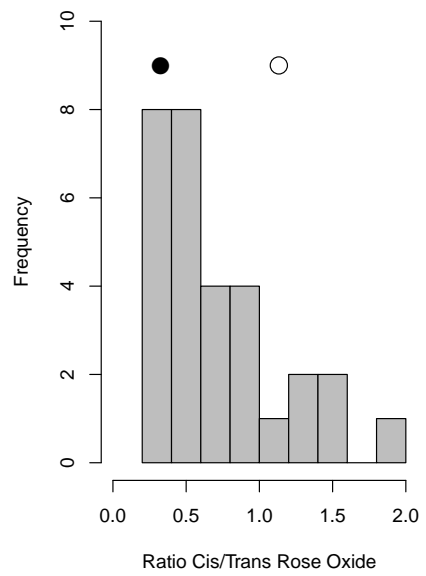

Supplement: 1471-2164-13-573-S1.pdf [file 1471-2164-13-573-S1.pdf]
