# Supplementary material for: QTL mapping of the production of wine aroma compounds by yeast
Source: PubMed Central journal article supplement (PMC3575298; doi:10.1186/1471-2164-13-573), 2012-10-30
Supplement: 1471-2164-13-573-S2.pdf [file 1471-2164-13-573-S2.pdf]

# Experiment A : Impact of flocculation on aroma production (additive model with interaction )

1- Effect of flocculation and locus Chr XIV :660000 on ethyl hexanoate production by segregants containing S288C or 59A allele (non flocculant strains: 0 in red, flocculant strains : 1, in blue). Error bars correspond to one SD.

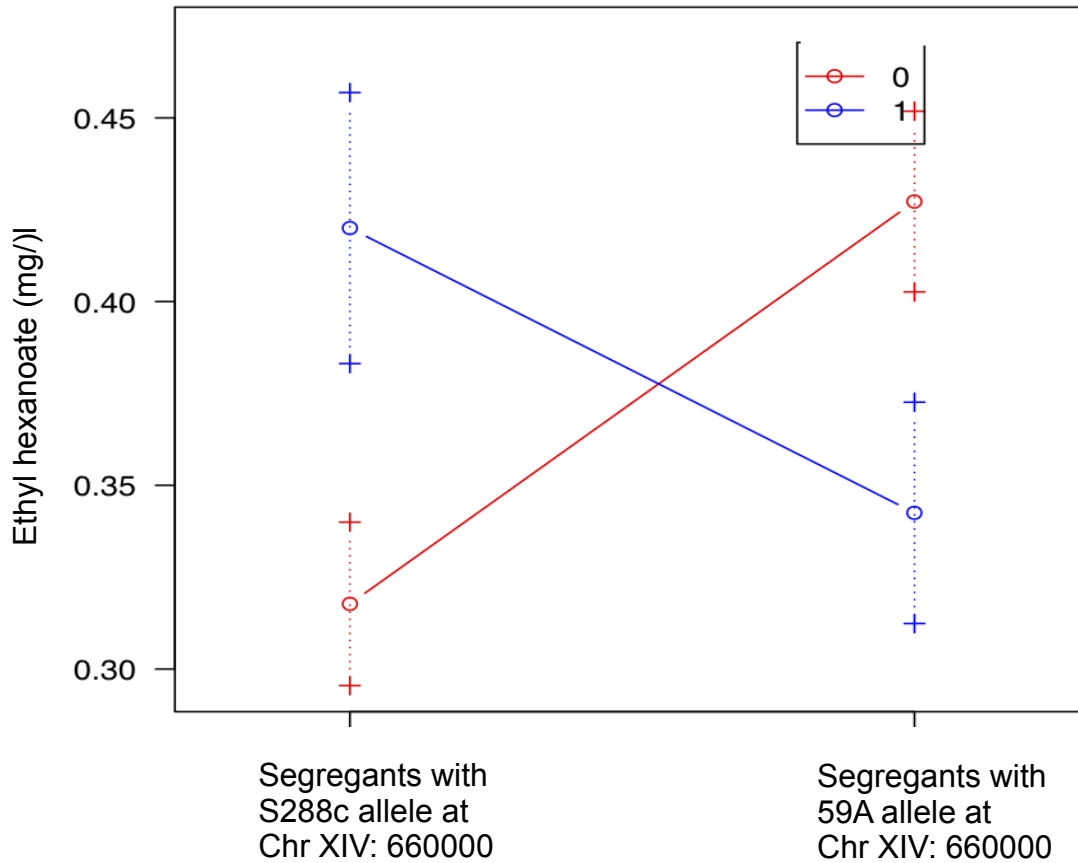

Results of QTL analysis with Haley-Knott regression (Normal model, 30 segregants flocculation )

|                                   | Mean     | SE      | P value |
|-----------------------------------|----------|---------|---------|
| Flocculation                      | 0.01673  | 0.02360 | 0.0005  |
| Marker at position Chr XIV 660000 | 0.13698  | 0.03246 | 0.0001  |
| interaction                       | -0.31184 | 0.06908 | 0.0001  |

2- Effect of flocculation and locus chr1:38000 on the concentration of cis-roseoxide measured at the end of fermentation. Results are given for segregants containing S288C or 59A allele (non flocculant strains: 0 in red, flocculant strains : 1, in blue) in arbitrary units (au). Error bars correspond to one SD.

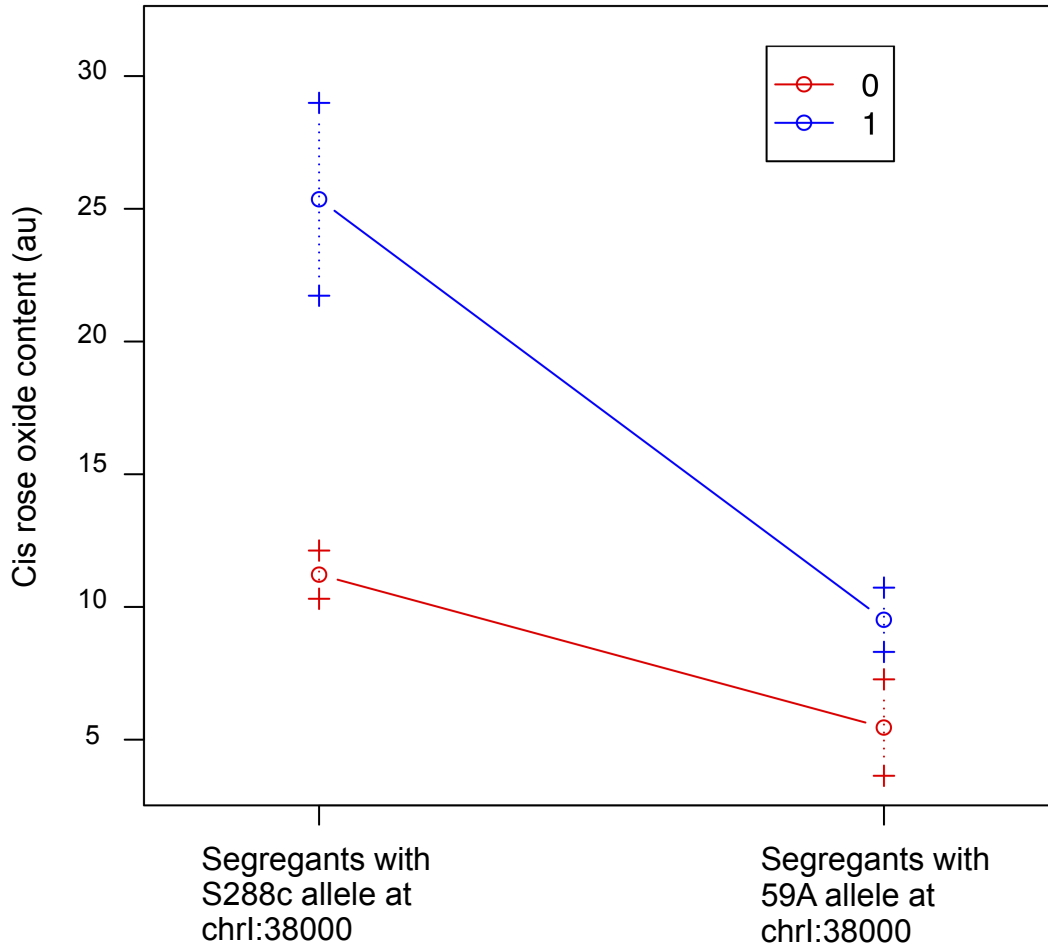

Results of QTL analysis with Haley-Knott regression for QTL (Normal model, 30 segregants)

|                         | Mean (au) | SE   | P value |
|-------------------------|-----------|------|---------|
| Flocculation            | 9.10      | 9.9  | 0.0009  |
| marker at chr I : 38000 | -5.76     | 2.11 | 0.0001  |
| interraction            | -10.09    | 4.21 | 0.024   |

3- Effect of flocculation and locus Chr VII:66000 on the concentration of cis-roseoxide measured at the end of fermentation. Results are given for segregants containing S288C or 59A allele (non flocculant strains: 0 in red, flocculant strains : 1, in blue) in arbitrary units (au). Error bars correspond to one SD.

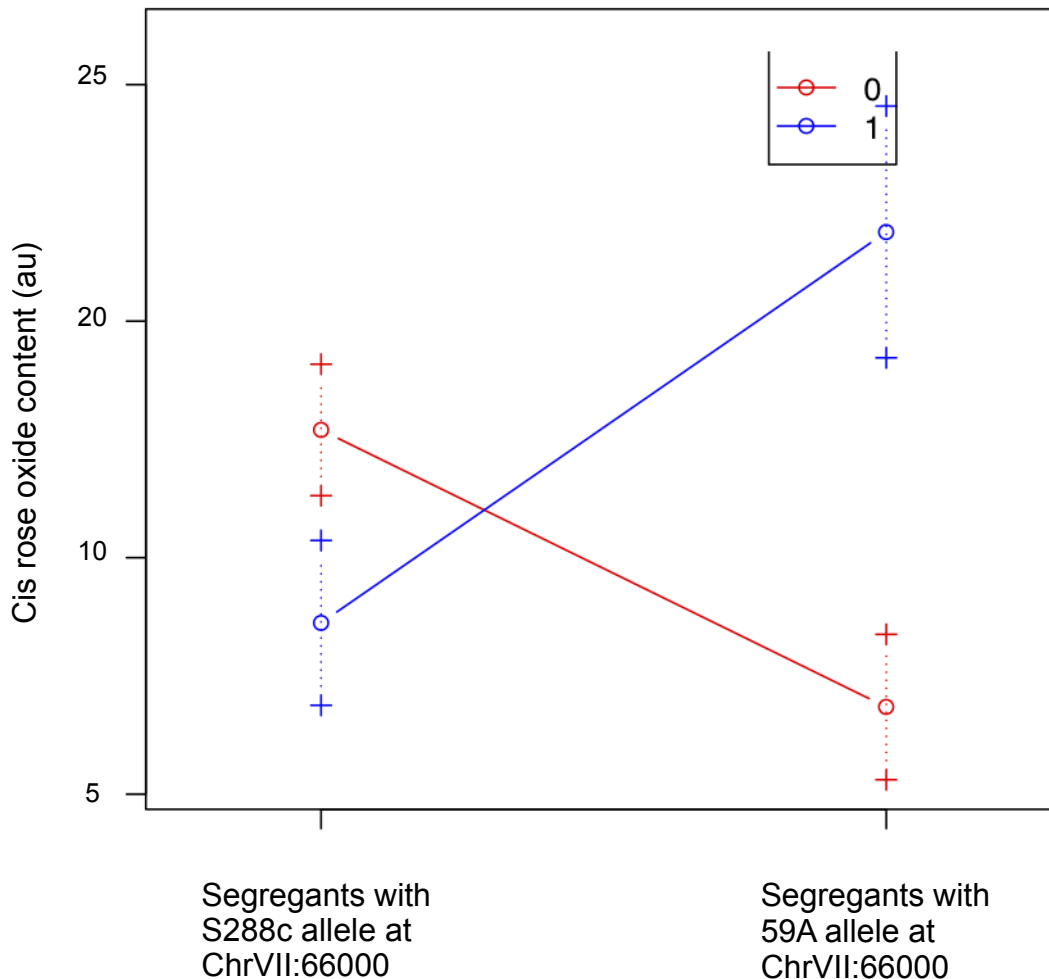

Results of QTL analysis with Haley-Knott regression for QTL (Normal model, 30 segregants)

|                         | Mean (au) | SE   | P value |
|-------------------------|-----------|------|---------|
| Flocculation            | 9.10      | 9.9  | 0.0009  |
| marker at Chr VII 66000 | -5.76     | 2.11 | 0.0001  |
| interraction            | -10.09    | 4.21 | 0.024   |

2- Effect of *ABZ1* locus and locus Chr XIII:280000 on ethyl-decanoate production by segregants containing S288C or 59A allele (S288C-*ABZ1*allele : AA in red, 59A-*ABZ1*allele: AB in blue)

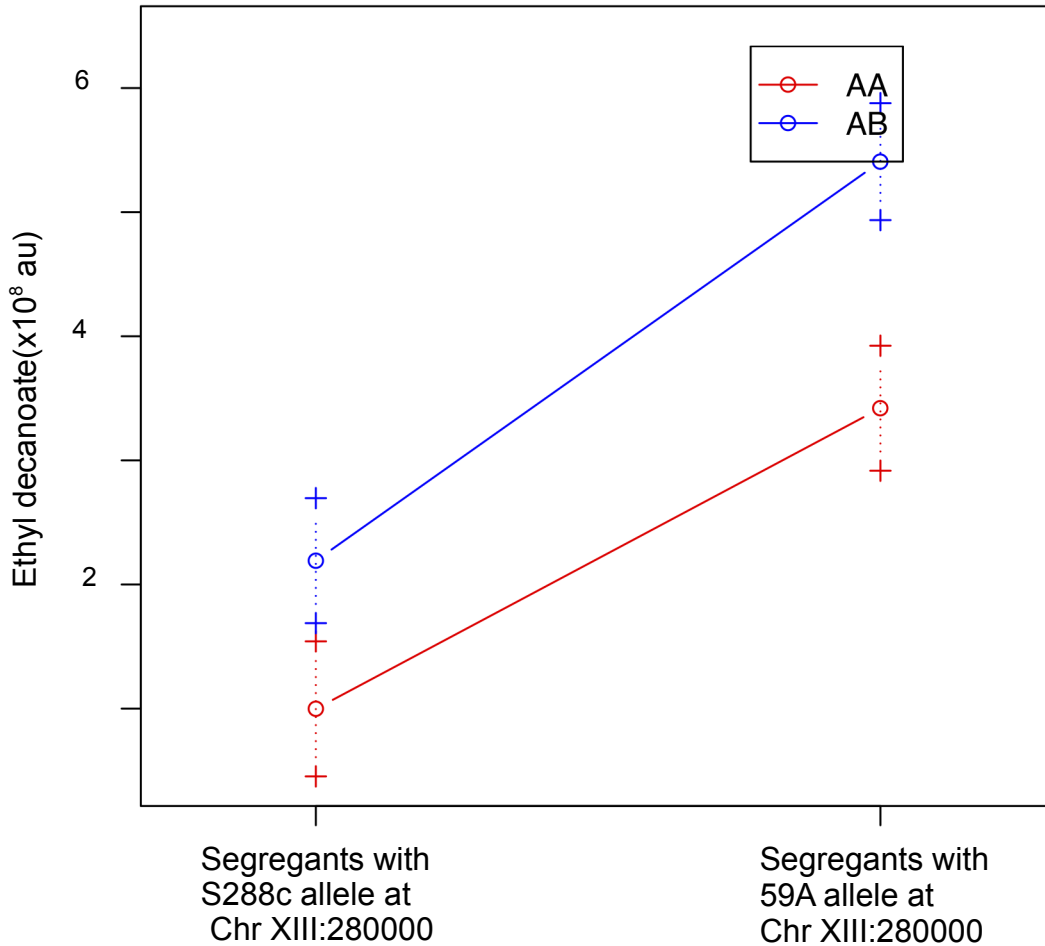

Results of QTL analysis with Haley-Knott regression for QTL (Normal model, 30 segregants)

|                              | Mean (x10 <sup>8</sup> au) | SE   | P value |
|------------------------------|----------------------------|------|---------|
| <i>ABZ1</i> (Chr VII:351000) | 1.56                       | 0.53 | 0.00728 |
| marker at Chr XIII:280000    | 2.89                       | 0.54 | 0.00001 |
|                              |                            |      |         |

## Experiment B : Impact of flocculation on aroma production (additive model with interaction )

1- Effect of flocculation and locus Chr VII :351000 on dodecanoic production by segregants containing S288C or 59A allele (non flocculant strains: 0 in red, flocculant strains : 1 in blue)

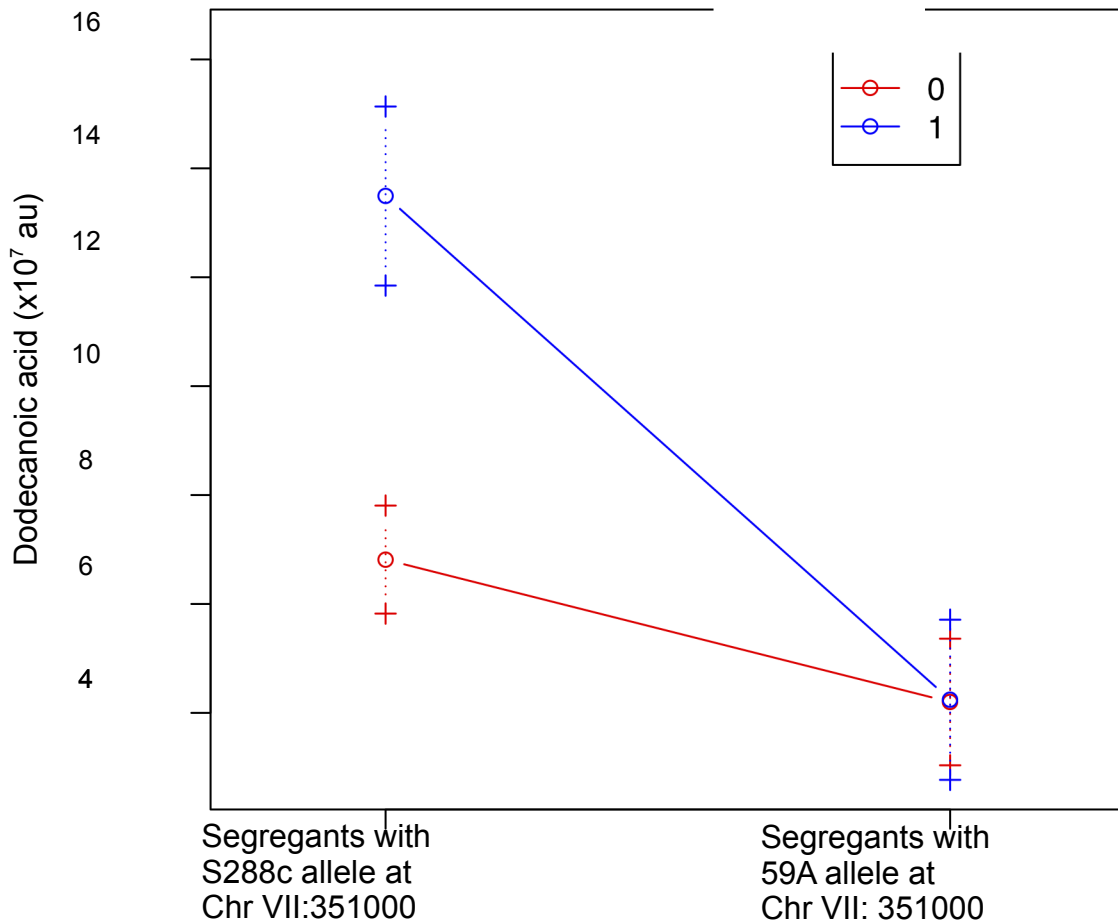

Results of QTL analysis with Haley-Knott regression for QTL  
(Normal model, 30 segregants)

|                            | Mean (x10 <sup>7</sup> au) | SE    | P value |
|----------------------------|----------------------------|-------|---------|
| Flocculation               | 3.77                       | 11.5  | 0.00125 |
| marker at Chr VII : 351000 | -4.32                      | 17.39 | 0.00002 |
| interaction                | -7.07                      | 27.48 | 0.01666 |

# Experiment B : Impact of the polymorphism of *ABZ1* on aroma production (additive model)

1- Effect of *ABZ1* locus and locus Chr XIII:280000 on ethyl-octanoate production by segregants containing S288C or 59A allele (S288C-*ABZ1*allele : AA in red, 59A-*ABZ1*allele: AB in blue)

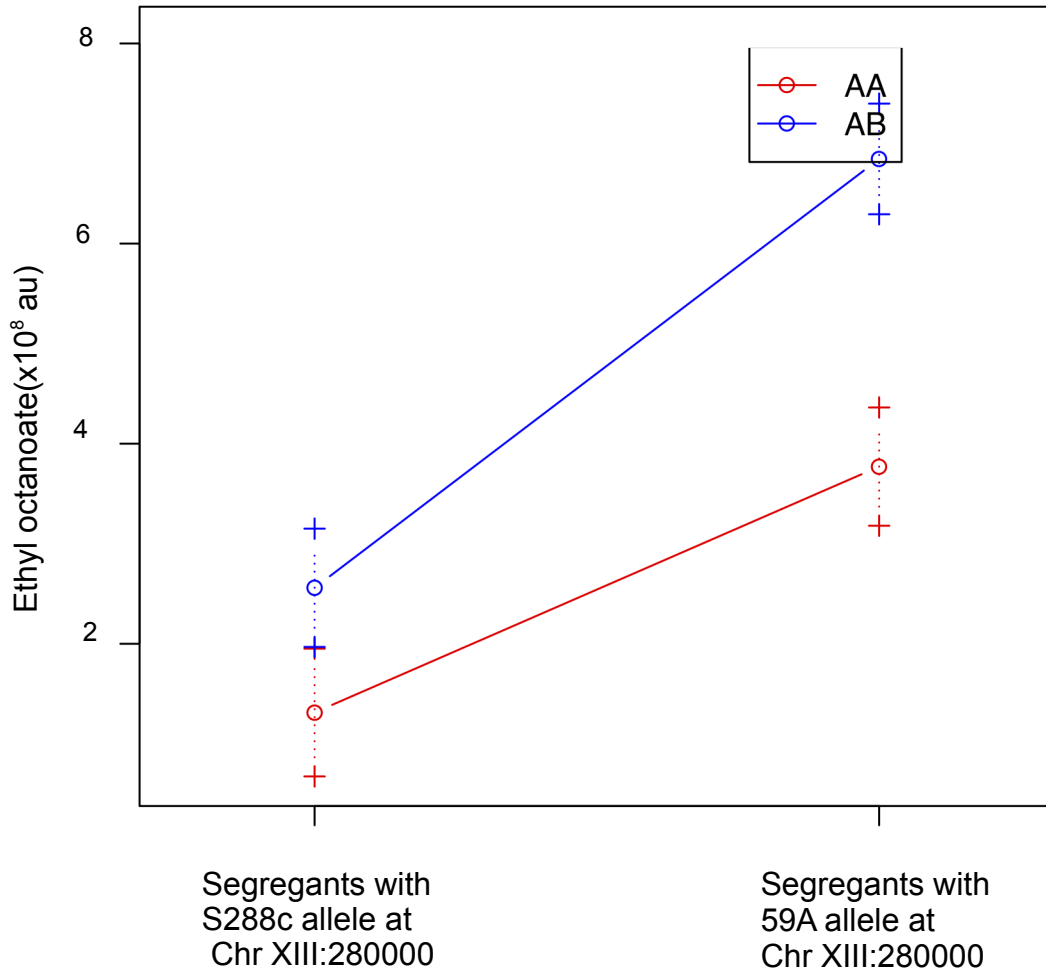

Results of QTL analysis with Haley-Knott regression for QTL (Normal model, 30 segregants)

|                              | Mean (x10 <sup>8</sup> au) | SE   | P value |
|------------------------------|----------------------------|------|---------|
| <i>ABZ1</i> (Chr VII:351000) | 2.16                       | 0.62 | 0.00198 |
| marker at Chr XIII:280000    | 3.50                       | 0.63 | 0.00001 |

2- Effect of *ABZ1* locus and locus Chr XIII:280000 on ethyl-decanoate production by segregants containing S288C or 59A allele (S288C-*ABZ1*allele : AA in red, 59A-*ABZ1*allele: AB in blue)



Results of QTL analysis with Haley-Knott regression for QTL (Normal model, 30 segregants)

|                              | Mean (x10 <sup>8</sup> au) | SE   | P value |
|------------------------------|----------------------------|------|---------|
| <i>ABZ1</i> (Chr VII:351000) | 1.56                       | 0.53 | 0.00728 |
| marker at Chr XIII:280000    | 2.89                       | 0.54 | 0.00001 |
|                              |                            |      |         |

## Variability of fermentation length and flocculation ability of the different segregants

---

|                         | Flocculation | Fermentation length in experiment A (hours) |
|-------------------------|--------------|---------------------------------------------|
| <b>Parental strains</b> |              |                                             |
| 59A                     | 0            | 351                                         |
| S288C                   | 0            | 811                                         |
| <b>Segregants</b>       |              |                                             |
| 10b                     | 1            | 534                                         |
| 14a                     | 1            | 783                                         |
| 14b                     | 0            | 627                                         |
| 16a                     | 0            | 797                                         |
| 16b                     | 1            | 691                                         |
| 16c                     | 0            | 641                                         |
| 16d                     | 0            | 627                                         |
| 17a                     | 1            | 534                                         |
| 18b                     | 0            | 351                                         |
| 18c                     | 0            | 441                                         |
| 19b                     | 0            | 470                                         |
| 19c                     | 0            | 627                                         |
| 1b                      | 0            | 452                                         |
| 20a                     | 0            | 351                                         |
| 20b                     | 1            | 431                                         |
| 22a                     | 0            | 627                                         |
| 22c                     | 0            | 470                                         |
| 22d                     | 1            | 351                                         |
| 23b                     | 1            | 617                                         |
| 24a                     | 0            | 617                                         |
| 25a                     | 0            | 783                                         |
| 28b                     | 0            | 351                                         |
| 29c                     | 1            | 470                                         |
| 31b                     | 0            | 627                                         |
| 3a                      | 1            | 351                                         |
| 4c                      | 1            | 431                                         |
| 5a                      | 0            | 525                                         |
| 6b                      | 0            | 351                                         |
| 7a                      | 0            | 410                                         |
| 9a                      | 0            | 470                                         |

---
