# Supplementary material for: QTL mapping of the production of wine aroma compounds by yeast
Source: PubMed Central journal article supplement (PMC3575298; doi:10.1186/1471-2164-13-573), 2012-10-30
Supplement: 1471-2164-13-573-S3.pdf [file 1471-2164-13-573-S3.pdf]

|                          | 2- Phenyl ethanol (microg/l) | 2-Phenyl ethanol acetate (microg/l) |
|--------------------------|------------------------------|-------------------------------------|
| <b>Control MS300</b>     |                              |                                     |
| 59A-ABZ1                 | 214.7 ± 24.1                 | 118.3 ± 22.3                        |
| S288C-ABZ1               | 93.6 ± 5.8                   | 33.7 ± 2.4                          |
| pvalue                   | 0.001                        | 0.003                               |
| <b>MS300+pAMB(1mg/l)</b> |                              |                                     |
| 59A-ABZ1                 | 253.22 ± 25.2                | 180.4 ± 38.7                        |
| S288C-ABZ1               | 149.1 ± 39.3                 | 183.8 ± 28.6                        |
| pvalue                   | 0.018                        | 0.910                               |
